# Supplementary material for: Nitrate removal by acid-tolerant Fictibacillus phosphorivorans MJ9 in acidic anaerobic environments
Source: Royal Society of Chemistry journal article supplement (doi:10.1039/d6ra01143h), 2026-05-18
Supplement: d6ra01143h1.pdf [file d6ra01143h1.pdf]

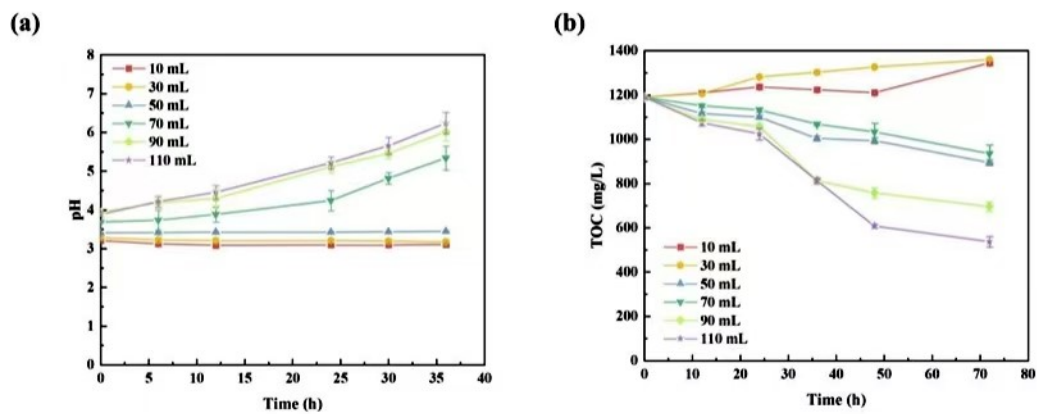

1

2 Fig. S1 Changes in pH(a) and TOC(b) content during the course of the reaction process.

3 Section 1: To mitigate interference from suspended solids and color in the acidic wastewater,

4 samples for OD<sub>600</sub> measurement were first centrifuged at 10,000 × g for 5 minutes to pellet cells

5 and particulates. The supernatant was discarded, and the pellet was gently resuspended in an equal

6 volume of sterile phosphate-buffered saline (PBS, pH 7.0) prior to measurement.

7
